# Supplementary material for: A Novel Lipopeptaibol Emericellipsin A with Antimicrobial and Antitumor Activity Produced by the Extremophilic Fungus Emericellopsis alkalina
Source: PubMed Central journal article supplement (PMC6278523; doi:10.3390/molecules23112785), 2018-10-27
Supplement: molecules-23-02785-s001.pdf [file molecules-23-02785-s001.pdf]

**Table S1.** Chemical shifts and HMBC correlations observed in the NMR spectra of emericellipsin A.

| No | Amino acid                                                    | Position       | 13C/15N | 1H          | HMBC*                                                               |
|----|---------------------------------------------------------------|----------------|---------|-------------|---------------------------------------------------------------------|
| 1  | (2R)-2-methyl decanoic acid                                   | C1             | 176.05  | -           | -                                                                   |
|    |                                                               | C2             | 37.159  | 2.627       | C1,C3,C3',C4                                                        |
|    |                                                               | C3             | 33.833  | 1.27/1.51   | C1, C2, C3, C3', 5                                                  |
|    |                                                               | C3'            | 17.435  | 1.022       | C1, C2, C3                                                          |
|    |                                                               | C4             | 27.084  | 1.196/1.276 | C5                                                                  |
|    |                                                               | C5             | 29.542  | 1.237       | C4, C6, C7                                                          |
|    |                                                               | C6             | 29.382  | 1.238       | C4, C5, C7, C8                                                      |
|    |                                                               | C7             | 29.07   | 1.239       | C5, C6, C8                                                          |
|    |                                                               | C8             | 31.729  | 1.237       | C7, C9, C10                                                         |
|    |                                                               | C9             | 22.556  | 1.262       | C7, C8, C10                                                         |
| 2  | (3R)-3-methylproline                                          | C10            | 14.421  | 0.856       | C8, C9                                                              |
|    |                                                               | C              | 172.9   | -           | -                                                                   |
|    |                                                               | C $\alpha$     | 67.9    | 3.72        | 1-C1, C, C $\beta$ , C $\gamma$ 1, C $\gamma$ 2, C $\delta$ 1       |
|    |                                                               | C $\beta$      | 37.7    | 2.2         | C $\alpha$ , C $\gamma$ 1, C $\gamma$ 2, C $\delta$ 1               |
|    |                                                               | C $\gamma$ 1   | 32.7    | 1.577/2.08  | N, C $\alpha$ , C $\beta$ , C $\gamma$ 2, C $\delta$ 1              |
|    |                                                               | C $\gamma$ 2   | 17.9    | 1.056       | C $\alpha$ , C $\beta$ , C $\gamma$ 1                               |
|    |                                                               | C $\delta$ 1   | 46.7    | 3.62/3.685  | C $\beta$ , C $\gamma$ 1                                            |
|    |                                                               | N              | 132.000 | -           | -                                                                   |
|    |                                                               | C              | 174.067 | -           | -                                                                   |
|    |                                                               | C $\alpha$     | 52.617  | 4.126       | 2-C, C, N, C $\beta$ , C $\gamma$                                   |
| 3  | (2S,4S)-2-Amino-4-methyl-6-hydroxy-8-oxodecanoic acid (AHMOD) | N              | 115.241 | 8.069       | 2-C, C, C $\alpha$ , C $\beta$                                      |
|    |                                                               | C $\beta$      | 37.586  | 1.449/1.731 | N, C, C $\alpha$ , C $\gamma$ , C $\delta$ 1, C $\delta$ 2          |
|    |                                                               | C $\gamma$     | 26.587  | 1.663       | C $\alpha$ , C $\beta$ , C $\delta$ 1, C $\delta$ 2, C $\epsilon$ 1 |
|    |                                                               | C $\delta$ 1   | 45.186  | 1.294       | C $\gamma$ , C $\beta$ , C $\delta$ 2, C $\epsilon$ 1, C $\xi$ 1    |
|    |                                                               | C $\delta$ 2   | 19.88   | 0.862       | C $\beta$ , C $\gamma$ , C $\delta$ 1                               |
|    |                                                               | C $\epsilon$ 1 | 65.402  | 3.988       | C $\gamma$ , C $\delta$ 1, C $\xi$ 1, C $\eta$ 1                    |
|    |                                                               | C $\xi$ 1      | 50.634  | 2.445       | C $\delta$ 1, C $\epsilon$ 1, C $\eta$ 1, C $\theta$ 1              |
|    |                                                               | O $\xi$ 2      | -       | 4.623       | C $\gamma$ , C $\delta$ 1, C $\epsilon$ 1, C $\xi$ 1                |
|    |                                                               | C $\eta$ 1     | 210.532 | -           | -                                                                   |
|    |                                                               | C $\theta$ 1   | 36.425  | 2.445       | C $\eta$ 1, C $\iota$ 1                                             |
| 4  | L-Alanine                                                     | C $\iota$ 1    | 7.917   | 0.907       | C $\eta$ 1, C $\theta$ 1                                            |
|    |                                                               | C              | 173.798 | -           | -                                                                   |

|   |                                       |              |         |             |                                                       |
|---|---------------------------------------|--------------|---------|-------------|-------------------------------------------------------|
|   |                                       | C $\alpha$   | 51.023  | 3.993       | C, N, C $\beta$                                       |
|   |                                       | N            | 120.328 | 7.85        | C, C $\alpha$ , C $\beta$                             |
|   |                                       | C $\beta$    | 16.964  | 1.313       | C, N, C $\beta$                                       |
|   |                                       | C            | 173.791 | -           | -                                                     |
|   |                                       | C $\alpha$   | 56.317  | -           | -                                                     |
| 5 | 2-Aminoisobutyric acid                | N            | 126.292 | 7.873       | 4-C, C, C $\alpha$ , C $\beta$ 1, C $\beta$ 2         |
|   |                                       | C $\beta$ 1  | 25.920  | 1.344       | C, N, C $\alpha$ , C $\beta$ 2                        |
|   |                                       | C $\beta$ 2  | 24.414  | 1.369       | C, N, C $\alpha$ , C $\beta$ 1                        |
|   |                                       | C            | 171.167 | -           | -                                                     |
|   |                                       | C $\alpha$   | 60.042  | 3.783       | 5-C, C, C $\beta$ , C $\gamma$ 1, C $\gamma$ 2        |
|   |                                       | N            | 110.329 | 7.271       | 5-C, C, C $\alpha$ , C $\beta$                        |
| 6 | L-Isoleucine                          | C $\beta$    | 35.613  | 1.865       | C $\alpha$ , C $\gamma$ 1, C $\gamma$ 2, C $\delta$ 1 |
|   |                                       | C $\gamma$ 1 | 25.419  | 1.126/1.513 | C $\alpha$ , C $\beta$ , C $\gamma$ 2, C $\delta$ 1   |
|   |                                       | C $\gamma$ 2 | 15.736  | 0.839       | C $\alpha$ , C $\beta$ , C $\gamma$ 1                 |
|   |                                       | C $\delta$ 1 | 11.542  | 0.810       | C $\beta$ , C $\gamma$ 1                              |
|   |                                       | C            | 174.495 | -           | -                                                     |
|   |                                       | C $\alpha$   | 59.901  | -           | -                                                     |
| 7 | L-isovaline                           | N            | 125.328 | 7.298       | 6-C, C, C $\alpha$ , C $\beta$ 1, C $\beta$ 2         |
|   |                                       | C $\beta$ 1  | 30.714  | 1.773       | N, C, C $\alpha$ , C $\beta$ 2, C $\gamma$ 1          |
|   |                                       | C $\beta$ 2  | 20.887  | 1.326       | N, C, C $\alpha$ , C $\beta$ 1, C $\gamma$ 1          |
|   |                                       | C $\gamma$ 1 | 8.283   | 0.743       | C $\alpha$ , C $\beta$ 1                              |
|   |                                       | C            | 171.995 | -           | -                                                     |
| 8 | $\beta$ -alanine                      | C $\alpha$   | 36.394  | 3.114/3.483 | 7-C, C, C $\beta$                                     |
|   |                                       | C $\beta$    | 36.601  | 2.223/2.335 | N, C, C $\alpha$ , 7-C                                |
|   |                                       | N            | 107.479 | 7.523       | 7-C, C $\alpha$ , C $\beta$                           |
|   |                                       | N1           | 127.477 | 7.637       | 8-C, C1, C2'                                          |
|   |                                       | C1           | 42.000  | 4.150       | 8-C, C2',                                             |
|   |                                       | C2           | 49.720  | 3.030       | C1, N3                                                |
|   |                                       | C2'          | 18.57   | 1.118       | C1                                                    |
| 9 | N-(2-Hydroxyethyl)-1,2-propanediamine | N3           | 39.02   | 8.155/8.339 | -                                                     |
|   |                                       | C4           | 52.499  | 3.029       | -                                                     |
|   |                                       | C5           | 56.745  | 3.675       | C4                                                    |
|   |                                       | O6           | -       | 5.189       | C4, C5                                                |

\*key cross-peaks between the current proton and carbons/nitrogens, observed in HMBC spectra.
